# Supplementary material for: The Gut Microbiome Alterations in Pediatric Patients with Functional Abdominal Pain Disorders
Source: MDPI journal article supplement (doi:10.3390/microorganisms9112354), 2021-11-15
Supplement: s1 [file s1]

| sample-id | input   | filtered | percentage of input passed filter | denoised | merged  | percentage of input merged | non-chimeric | percentage of input non-chimeric |
|-----------|---------|----------|-----------------------------------|----------|---------|----------------------------|--------------|----------------------------------|
| #q2:types | numeric | numeric  | numeric                           | numeric  | numeric | numeric                    | numeric      | numeric                          |
| 1-001     | 56654   | 20259    | 35.76                             | 19577    | 18721   | 33.04                      | 7790         | 13.75                            |
| 1-002     | 237006  | 77136    | 32.55                             | 74472    | 70499   | 29.75                      | 27487        | 11.6                             |
| 1-003     | 362368  | 124851   | 34.45                             | 121868   | 116120  | 32.04                      | 40983        | 11.31                            |
| 1-004     | 86405   | 27120    | 31.39                             | 25672    | 23544   | 27.25                      | 8450         | 9.78                             |
| 1-005     | 157070  | 54034    | 34.4                              | 51815    | 48691   | 31                         | 18904        | 12.04                            |
| 1-006     | 277696  | 89227    | 32.13                             | 86157    | 81325   | 29.29                      | 29098        | 10.48                            |
| 1-007     | 282485  | 98604    | 34.91                             | 95855    | 91436   | 32.37                      | 32260        | 11.42                            |
| 1-008     | 123189  | 36343    | 29.5                              | 34485    | 31920   | 25.91                      | 14447        | 11.73                            |
| 1-009     | 310579  | 105803   | 34.07                             | 101778   | 94745   | 30.51                      | 35219        | 11.34                            |
| 1-011     | 209034  | 65459    | 31.32                             | 63439    | 58848   | 28.15                      | 17981        | 8.6                              |
| 1-012     | 193143  | 63321    | 32.78                             | 60435    | 56799   | 29.41                      | 22100        | 11.44                            |
| 1-015     | 116137  | 34843    | 30                                | 33732    | 31537   | 27.15                      | 11794        | 10.16                            |
| 1-016     | 151068  | 52377    | 34.67                             | 50689    | 47949   | 31.74                      | 19317        | 12.79                            |
| 1-017     | 168275  | 56512    | 33.58                             | 54239    | 50968   | 30.29                      | 22164        | 13.17                            |
| 1-021     | 105499  | 35335    | 33.49                             | 33486    | 30783   | 29.18                      | 12216        | 11.58                            |
| 1-024     | 74587   | 21967    | 29.45                             | 20579    | 19104   | 25.61                      | 10401        | 13.94                            |
| 1-025     | 140254  | 46400    | 33.08                             | 44279    | 41732   | 29.75                      | 18639        | 13.29                            |
| 1-027     | 84244   | 22040    | 26.16                             | 21075    | 19597   | 23.26                      | 8012         | 9.51                             |
| 1-029     | 320853  | 109268   | 34.06                             | 105653   | 99754   | 31.09                      | 36534        | 11.39                            |
| 1-030     | 56971   | 17761    | 31.18                             | 16977    | 15551   | 27.3                       | 7625         | 13.38                            |
| 1-033     | 160488  | 55038    | 34.29                             | 52821    | 49466   | 30.82                      | 19626        | 12.23                            |
| 1-034     | 311356  | 105406   | 33.85                             | 102520   | 95793   | 30.77                      | 34419        | 11.05                            |
| 1-036     | 118907  | 37687    | 31.69                             | 36090    | 33434   | 28.12                      | 14975        | 12.59                            |
| 1-039     | 256954  | 80070    | 31.16                             | 77046    | 71371   | 27.78                      | 27105        | 10.55                            |
| 1-043     | 40595   | 12729    | 31.36                             | 11892    | 10879   | 26.8                       | 6190         | 15.25                            |
| 1-044     | 231271  | 77604    | 33.56                             | 74608    | 69812   | 30.19                      | 20776        | 8.98                             |
| 1-046     | 181085  | 64548    | 35.65                             | 62586    | 58301   | 32.2                       | 22092        | 12.2                             |
| 1-055     | 66354   | 17919    | 27.01                             | 16910    | 15706   | 23.67                      | 8752         | 13.19                            |
| 2-001a    | 188040  | 60853    | 32.36                             | 58482    | 55039   | 29.27                      | 21641        | 11.51                            |

|        |        |        |       |        |        |       |       |       |
|--------|--------|--------|-------|--------|--------|-------|-------|-------|
| 2-001b | 218653 | 71216  | 32.57 | 68747  | 63831  | 29.19 | 20463 | 9.36  |
| 3-001  | 457973 | 147707 | 32.25 | 142848 | 132917 | 29.02 | 57647 | 12.59 |
| 3-002  | 170829 | 57807  | 33.84 | 55430  | 51419  | 30.1  | 19042 | 11.15 |
| 3-003  | 96031  | 30545  | 31.81 | 29051  | 27057  | 28.18 | 12325 | 12.83 |
| 3-004  | 119690 | 38876  | 32.48 | 36903  | 34337  | 28.69 | 14631 | 12.22 |
| 3-007  | 157625 | 51301  | 32.55 | 48745  | 44796  | 28.42 | 16403 | 10.41 |
| 3-008  | 168680 | 50049  | 29.67 | 47661  | 44135  | 26.16 | 18786 | 11.14 |
| 3-013  | 123796 | 42099  | 34.01 | 40234  | 37389  | 30.2  | 14980 | 12.1  |
| 3-014  | 302121 | 102870 | 34.05 | 99553  | 94389  | 31.24 | 32575 | 10.78 |
| 3-015  | 366016 | 122190 | 33.38 | 118446 | 112281 | 30.68 | 37240 | 10.17 |
| 3-016  | 251335 | 85205  | 33.9  | 82131  | 76515  | 30.44 | 28367 | 11.29 |
| 3-017  | 85773  | 26199  | 30.54 | 24703  | 22548  | 26.29 | 11577 | 13.5  |
| 3-019  | 192372 | 60894  | 31.65 | 58160  | 53909  | 28.02 | 20657 | 10.74 |
| 4-001  | 649487 | 201050 | 30.96 | 196576 | 188015 | 28.95 | 58101 | 8.95  |
| 4-002  | 73660  | 19979  | 27.12 | 19090  | 17294  | 23.48 | 8575  | 11.64 |
| 4-003  | 140668 | 46637  | 33.15 | 44750  | 41588  | 29.56 | 14488 | 10.3  |
| 4-004  | 99631  | 30393  | 30.51 | 29349  | 27008  | 27.11 | 9064  | 9.1   |
| 4-005  | 276802 | 79062  | 28.56 | 75960  | 70432  | 25.44 | 22501 | 8.13  |
| 4-006  | 235197 | 71294  | 30.31 | 68302  | 63591  | 27.04 | 24745 | 10.52 |
| 4-007  | 105816 | 33444  | 31.61 | 31799  | 29508  | 27.89 | 12134 | 11.47 |
| 4-008  | 255808 | 76544  | 29.92 | 73433  | 68078  | 26.61 | 27032 | 10.57 |
| 4-009  | 164004 | 52932  | 32.27 | 50329  | 46837  | 28.56 | 18180 | 11.09 |
| 4-010  | 158608 | 45310  | 28.57 | 42708  | 39889  | 25.15 | 17090 | 10.77 |
| 4-011  | 195075 | 65643  | 33.65 | 62888  | 59240  | 30.37 | 21179 | 10.86 |
| 4-012  | 120030 | 38322  | 31.93 | 36607  | 33677  | 28.06 | 15005 | 12.5  |
| 5-001  | 319920 | 103648 | 32.4  | 98352  | 91058  | 28.46 | 36412 | 11.38 |
| 5-002  | 365294 | 118117 | 32.33 | 113051 | 105020 | 28.75 | 38278 | 10.48 |
| 5-003  | 36224  | 11215  | 30.96 | 10583  | 9521   | 26.28 | 5273  | 14.56 |
| 5-004  | 92849  | 30729  | 33.1  | 29329  | 27209  | 29.3  | 11945 | 12.86 |
| 5-005  | 138875 | 44402  | 31.97 | 42683  | 39793  | 28.65 | 17426 | 12.55 |
| 5-011  | 67535  | 19185  | 28.41 | 18084  | 16533  | 24.48 | 8608  | 12.75 |
| 5-012  | 94605  | 30598  | 32.34 | 29521  | 28041  | 29.64 | 10617 | 11.22 |
| 5-013  | 63411  | 22261  | 35.11 | 21604  | 20359  | 32.11 | 7983  | 12.59 |
| 5-014  | 130531 | 39887  | 30.56 | 38177  | 36048  | 27.62 | 16054 | 12.3  |

|        |        |        |       |        |        |       |       |       |
|--------|--------|--------|-------|--------|--------|-------|-------|-------|
| 5-015  | 82999  | 23882  | 28.77 | 22431  | 20952  | 25.24 | 11229 | 13.53 |
| 5-016  | 149582 | 46166  | 30.86 | 43484  | 39614  | 26.48 | 18744 | 12.53 |
| 5-017  | 202351 | 64795  | 32.02 | 61722  | 57664  | 28.5  | 24688 | 12.2  |
| 5-018  | 69160  | 22390  | 32.37 | 21104  | 19053  | 27.55 | 9038  | 13.07 |
| 5-020  | 47662  | 12591  | 26.42 | 11775  | 10681  | 22.41 | 5751  | 12.07 |
| 5-021  | 49795  | 16733  | 33.6  | 15813  | 14609  | 29.34 | 6380  | 12.81 |
| 5-022  | 124284 | 36285  | 29.2  | 34365  | 31853  | 25.63 | 14213 | 11.44 |
| 5-023  | 152212 | 50835  | 33.4  | 48898  | 45999  | 30.22 | 17321 | 11.38 |
| 5-024  | 87347  | 28954  | 33.15 | 27725  | 25409  | 29.09 | 11199 | 12.82 |
| 5-025  | 308132 | 106851 | 34.68 | 102440 | 94458  | 30.66 | 32250 | 10.47 |
| 5-026  | 231801 | 76398  | 32.96 | 72742  | 66327  | 28.61 | 24641 | 10.63 |
| 6-001  | 522167 | 170746 | 32.7  | 165043 | 154179 | 29.53 | 47416 | 9.08  |
| 6-002  | 205461 | 54388  | 26.47 | 51673  | 47509  | 23.12 | 19989 | 9.73  |
| 6-003  | 126212 | 39725  | 31.47 | 37162  | 34129  | 27.04 | 14435 | 11.44 |
| 6-009  | 184028 | 54586  | 29.66 | 51610  | 46872  | 25.47 | 18392 | 9.99  |
| 6-015  | 221624 | 74909  | 33.8  | 71391  | 65563  | 29.58 | 24915 | 11.24 |
| 6-019  | 197157 | 60640  | 30.76 | 57411  | 53089  | 26.93 | 23044 | 11.69 |
| 6-021  | 67728  | 21937  | 32.39 | 20787  | 19219  | 28.38 | 8553  | 12.63 |
| 6-022  | 59426  | 18878  | 31.77 | 17626  | 16194  | 27.25 | 7619  | 12.82 |
| 6-023  | 53464  | 16109  | 30.13 | 15045  | 13510  | 25.27 | 6995  | 13.08 |
| 1-001c | 152834 | 115470 | 75.55 | 114592 | 113284 | 74.12 | 38000 | 24.86 |
| 1-002c | 117329 | 80834  | 68.9  | 78697  | 75465  | 64.32 | 17658 | 15.05 |
| 1-003c | 129506 | 95285  | 73.58 | 93391  | 89735  | 69.29 | 25341 | 19.57 |
| 1-005c | 100988 | 72125  | 71.42 | 71067  | 67580  | 66.92 | 17509 | 17.34 |
| 1-006c | 117049 | 85874  | 73.37 | 83992  | 81158  | 69.34 | 19813 | 16.93 |
| 1-007c | 107990 | 80832  | 74.85 | 79415  | 77014  | 71.32 | 26120 | 24.19 |
| 1-011c | 135983 | 99407  | 73.1  | 97820  | 94232  | 69.3  | 22531 | 16.57 |
| 1-015c | 120457 | 90236  | 74.91 | 88589  | 84877  | 70.46 | 18319 | 15.21 |
| 1-016c | 82418  | 61900  | 75.1  | 60764  | 58265  | 70.69 | 15479 | 18.78 |
| 1-017c | 103143 | 72467  | 70.26 | 70672  | 66893  | 64.85 | 17919 | 17.37 |
| 1-021c | 94852  | 66516  | 70.13 | 64696  | 61739  | 65.09 | 15076 | 15.89 |
| 1-024c | 60140  | 38373  | 63.81 | 37004  | 35171  | 58.48 | 10372 | 17.25 |
| 1-025c | 84014  | 63856  | 76.01 | 62565  | 60195  | 71.65 | 17412 | 20.73 |
| 1-029c | 86866  | 64192  | 73.9  | 63565  | 62456  | 71.9  | 28058 | 32.3  |

|        |        |        |       |        |        |       |       |       |
|--------|--------|--------|-------|--------|--------|-------|-------|-------|
| 1-030c | 89333  | 67257  | 75.29 | 65974  | 63076  | 70.61 | 16712 | 18.71 |
| 1-033c | 96314  | 72465  | 75.24 | 71358  | 69522  | 72.18 | 27759 | 28.82 |
| 1-039c | 125168 | 90735  | 72.49 | 88908  | 84682  | 67.65 | 19684 | 15.73 |
| 1-043c | 108938 | 77243  | 70.91 | 74112  | 69760  | 64.04 | 18769 | 17.23 |
| 1-044c | 121495 | 90771  | 74.71 | 89215  | 84406  | 69.47 | 19467 | 16.02 |
| 1-046c | 84023  | 58205  | 69.27 | 57290  | 55319  | 65.84 | 12606 | 15    |
| 3-001c | 108017 | 81587  | 75.53 | 79779  | 74540  | 69.01 | 17452 | 16.16 |
| 3-002c | 118982 | 86687  | 72.86 | 84409  | 79999  | 67.24 | 19037 | 16    |
| 3-003c | 122075 | 89473  | 73.29 | 87076  | 83320  | 68.25 | 22144 | 18.14 |
| 3-007c | 112646 | 81555  | 72.4  | 79650  | 75253  | 66.8  | 17655 | 15.67 |
| 3-008c | 149279 | 111264 | 74.53 | 109025 | 103428 | 69.29 | 26128 | 17.5  |
| 3-014c | 113679 | 84066  | 73.95 | 81910  | 77669  | 68.32 | 20090 | 17.67 |
| 3-015c | 116588 | 84160  | 72.19 | 81735  | 78137  | 67.02 | 19865 | 17.04 |
| 3-016c | 102771 | 73021  | 71.05 | 71209  | 67445  | 65.63 | 20565 | 20.01 |
| 3-019c | 141259 | 102364 | 72.47 | 98262  | 90528  | 64.09 | 21481 | 15.21 |
| 4-001c | 128063 | 96249  | 75.16 | 94967  | 91985  | 71.83 | 21489 | 16.78 |
| 4-002c | 146598 | 109616 | 74.77 | 106535 | 100204 | 68.35 | 24104 | 16.44 |
| 4-003c | 139281 | 100600 | 72.23 | 97710  | 92667  | 66.53 | 23363 | 16.77 |
| 4-004c | 118382 | 87262  | 73.71 | 85418  | 80459  | 67.97 | 16149 | 13.64 |
| 4-005c | 120912 | 84465  | 69.86 | 81480  | 76627  | 63.37 | 15841 | 13.1  |
| 4-006c | 110687 | 80471  | 72.7  | 78534  | 74645  | 67.44 | 22300 | 20.15 |
| 4-007c | 80878  | 55977  | 69.21 | 54791  | 52319  | 64.69 | 12723 | 15.73 |
| 4-008c | 102534 | 76718  | 74.82 | 75365  | 72536  | 70.74 | 19482 | 19    |
| 4-009c | 116559 | 86593  | 74.29 | 84657  | 81035  | 69.52 | 21413 | 18.37 |
| 4-010c | 110103 | 80968  | 73.54 | 78444  | 74901  | 68.03 | 21899 | 19.89 |
| 4-011c | 111185 | 80742  | 72.62 | 78760  | 75122  | 67.56 | 19429 | 17.47 |
| 4-012c | 126880 | 91765  | 72.32 | 89926  | 86017  | 67.79 | 21774 | 17.16 |
| 5-001c | 118938 | 87806  | 73.83 | 85714  | 81647  | 68.65 | 19858 | 16.7  |
| 5-002c | 122491 | 84691  | 69.14 | 82543  | 79347  | 64.78 | 20586 | 16.81 |
| 5-003c | 96277  | 67252  | 69.85 | 65891  | 62954  | 65.39 | 16591 | 17.23 |
| 5-004c | 121552 | 89486  | 73.62 | 86832  | 82312  | 67.72 | 20992 | 17.27 |
| 5-005c | 127514 | 94405  | 74.04 | 92570  | 87996  | 69.01 | 20637 | 16.18 |
| 5-011c | 129495 | 95589  | 73.82 | 92333  | 87368  | 67.47 | 25104 | 19.39 |
| 5-012c | 125223 | 91282  | 72.9  | 89607  | 85909  | 68.6  | 23096 | 18.44 |

|        |        |        |       |        |        |       |       |       |
|--------|--------|--------|-------|--------|--------|-------|-------|-------|
| 5-013c | 136698 | 100574 | 73.57 | 98837  | 95266  | 69.69 | 27991 | 20.48 |
| 5-014c | 101158 | 72739  | 71.91 | 71297  | 68055  | 67.28 | 15800 | 15.62 |
| 5-015c | 112049 | 82496  | 73.62 | 79740  | 75230  | 67.14 | 18008 | 16.07 |
| 5-016c | 92451  | 65835  | 71.21 | 63934  | 59742  | 64.62 | 13768 | 14.89 |
| 5-017c | 108687 | 80356  | 73.93 | 78203  | 74616  | 68.65 | 20861 | 19.19 |
| 5-018c | 118553 | 88726  | 74.84 | 86748  | 83428  | 70.37 | 22477 | 18.96 |
| 5-022c | 106555 | 77916  | 73.12 | 75715  | 72521  | 68.06 | 17886 | 16.79 |
| 5-023c | 114818 | 84042  | 73.2  | 82672  | 80236  | 69.88 | 15130 | 13.18 |
| 5-024c | 135000 | 101558 | 75.23 | 99263  | 93619  | 69.35 | 22655 | 16.78 |
| 5-025c | 130111 | 97710  | 75.1  | 94926  | 88177  | 67.77 | 17672 | 13.58 |
| 5-026c | 118458 | 87370  | 73.76 | 85013  | 80055  | 67.58 | 21197 | 17.89 |
| 6-001c | 101834 | 72468  | 71.16 | 70801  | 67098  | 65.89 | 14569 | 14.31 |
| 6-002c | 108664 | 77469  | 71.29 | 75749  | 73073  | 67.25 | 22223 | 20.45 |
| 6-003c | 123459 | 91714  | 74.29 | 90206  | 87545  | 70.91 | 19097 | 15.47 |
| 6-019c | 89041  | 67757  | 76.1  | 66511  | 64571  | 72.52 | 18262 | 20.51 |
| 6-023c | 97258  | 64634  | 66.46 | 63050  | 60200  | 61.9  | 13637 | 14.02 |
| 1-001d | 134429 | 98645  | 73.38 | 97304  | 94204  | 70.08 | 23555 | 17.52 |
| 1-002d | 126790 | 89847  | 70.86 | 87577  | 82639  | 65.18 | 16491 | 13.01 |
| 1-003d | 164231 | 112122 | 68.27 | 109751 | 103444 | 62.99 | 23963 | 14.59 |
| 1-005d | 127531 | 92673  | 72.67 | 90878  | 84695  | 66.41 | 17094 | 13.4  |
| 1-006d | 146012 | 103333 | 70.77 | 100341 | 94114  | 64.46 | 23056 | 15.79 |
| 1-007d | 152434 | 106358 | 69.77 | 104266 | 98522  | 64.63 | 20655 | 13.55 |
| 1-008d | 135942 | 92703  | 68.19 | 90260  | 85300  | 62.75 | 18733 | 13.78 |
| 1-011d | 121678 | 86551  | 71.13 | 84267  | 78953  | 64.89 | 13889 | 11.41 |
| 1-015d | 157821 | 114520 | 72.56 | 112581 | 107313 | 68    | 20927 | 13.26 |
| 1-016d | 139687 | 96215  | 68.88 | 94176  | 89322  | 63.94 | 21387 | 15.31 |
| 1-017d | 113880 | 80101  | 70.34 | 77277  | 72592  | 63.74 | 18684 | 16.41 |
| 1-021d | 117627 | 82513  | 70.15 | 79440  | 74634  | 63.45 | 16069 | 13.66 |
| 1-024d | 116113 | 77744  | 66.96 | 74782  | 70058  | 60.34 | 17336 | 14.93 |
| 1-025d | 124674 | 92452  | 74.15 | 90100  | 84964  | 68.15 | 19491 | 15.63 |
| 1-029d | 152405 | 112600 | 73.88 | 110055 | 103177 | 67.7  | 21364 | 14.02 |
| 1-030d | 112944 | 83986  | 74.36 | 82460  | 78335  | 69.36 | 20315 | 17.99 |
| 1-033d | 120592 | 89668  | 74.36 | 87852  | 83859  | 69.54 | 24478 | 20.3  |
| 1-036c | 158489 | 117620 | 74.21 | 115463 | 109196 | 68.9  | 21980 | 13.87 |

|        |        |        |       |        |        |       |       |       |
|--------|--------|--------|-------|--------|--------|-------|-------|-------|
| 1-039d | 124496 | 87123  | 69.98 | 85166  | 80017  | 64.27 | 15256 | 12.25 |
| 1-043d | 112182 | 79026  | 70.44 | 76865  | 72827  | 64.92 | 13978 | 12.46 |
| 1-044d | 106961 | 78297  | 73.2  | 76603  | 72199  | 67.5  | 16525 | 15.45 |
| 1-046d | 128996 | 93599  | 72.56 | 91704  | 86335  | 66.93 | 17679 | 13.71 |
| 1-055c | 104250 | 71835  | 68.91 | 69543  | 64947  | 62.3  | 14927 | 14.32 |
| 2-001d | 160056 | 112758 | 70.45 | 110287 | 104832 | 65.5  | 19075 | 11.92 |
| 3-001d | 104462 | 78358  | 75.01 | 76310  | 70897  | 67.87 | 15976 | 15.29 |
| 3-002d | 117707 | 86979  | 73.89 | 84880  | 79081  | 67.18 | 16710 | 14.2  |
| 3-003d | 119895 | 87408  | 72.9  | 85079  | 80042  | 66.76 | 19416 | 16.19 |
| 3-004d | 120132 | 87136  | 72.53 | 85054  | 80345  | 66.88 | 18167 | 15.12 |
| 3-007d | 138232 | 98346  | 71.15 | 95450  | 88826  | 64.26 | 18145 | 13.13 |
| 3-008d | 137325 | 102352 | 74.53 | 99977  | 94825  | 69.05 | 23546 | 17.15 |
| 3-013c | 124209 | 89725  | 72.24 | 86913  | 81463  | 65.59 | 20039 | 16.13 |
| 3-013d | 135478 | 100152 | 73.92 | 97816  | 92737  | 68.45 | 23576 | 17.4  |
| 3-014d | 126257 | 89349  | 70.77 | 87165  | 82624  | 65.44 | 21332 | 16.9  |
| 3-015d | 138378 | 98767  | 71.37 | 95814  | 91359  | 66.02 | 19003 | 13.73 |
| 3-016d | 134432 | 98072  | 72.95 | 95568  | 90510  | 67.33 | 21082 | 15.68 |
| 3-019d | 174534 | 124620 | 71.4  | 120536 | 111636 | 63.96 | 24725 | 14.17 |
| 4-001d | 117678 | 84894  | 72.14 | 83347  | 79886  | 67.89 | 16325 | 13.87 |
| 4-002d | 96828  | 70725  | 73.04 | 68375  | 63610  | 65.69 | 15081 | 15.58 |
| 4-003d | 80537  | 55442  | 68.84 | 52789  | 49134  | 61.01 | 11835 | 14.7  |
| 4-004d | 101360 | 73004  | 72.02 | 70618  | 66569  | 65.68 | 15952 | 15.74 |
| 4-005d | 90439  | 65655  | 72.6  | 64232  | 60177  | 66.54 | 13385 | 14.8  |
| 4-006d | 134654 | 94383  | 70.09 | 91416  | 85440  | 63.45 | 20729 | 15.39 |
| 4-007d | 109822 | 78117  | 71.13 | 76015  | 71009  | 64.66 | 14323 | 13.04 |
| 4-008d | 122370 | 87881  | 71.82 | 85703  | 81038  | 66.22 | 19188 | 15.68 |
| 4-009d | 109692 | 72949  | 66.5  | 70780  | 66981  | 61.06 | 17213 | 15.69 |
| 4-010d | 116019 | 82448  | 71.06 | 79425  | 74807  | 64.48 | 17039 | 14.69 |
| 4-011d | 99776  | 69369  | 69.52 | 67152  | 62973  | 63.11 | 14869 | 14.9  |
| 4-012d | 158141 | 112460 | 71.11 | 110310 | 105678 | 66.83 | 24167 | 15.28 |
| 5-001d | 177445 | 130842 | 73.74 | 127322 | 119136 | 67.14 | 25343 | 14.28 |
| 5-002d | 133958 | 98347  | 73.42 | 95362  | 88570  | 66.12 | 19332 | 14.43 |
| 5-003d | 114242 | 83493  | 73.08 | 81272  | 76407  | 66.88 | 18329 | 16.04 |
| 5-004d | 131220 | 96031  | 73.18 | 92450  | 85462  | 65.13 | 21581 | 16.45 |

|        |        |        |       |        |        |       |       |       |
|--------|--------|--------|-------|--------|--------|-------|-------|-------|
| 5-011d | 130943 | 94517  | 72.18 | 90519  | 84177  | 64.29 | 21289 | 16.26 |
| 5-012d | 160374 | 115208 | 71.84 | 113262 | 108760 | 67.82 | 26086 | 16.27 |
| 5-013d | 150302 | 111350 | 74.08 | 109284 | 103664 | 68.97 | 25549 | 17    |
| 5-016d | 179436 | 130281 | 72.61 | 126883 | 117228 | 65.33 | 25970 | 14.47 |
| 5-017d | 190797 | 133892 | 70.18 | 129252 | 120348 | 63.08 | 27782 | 14.56 |
| 5-018d | 207274 | 152063 | 73.36 | 147923 | 138064 | 66.61 | 29488 | 14.23 |
| 5-022d | 138537 | 97872  | 70.65 | 94051  | 87238  | 62.97 | 19996 | 14.43 |
| 5-023d | 225270 | 163317 | 72.5  | 159938 | 152387 | 67.65 | 25241 | 11.2  |
| 5-024d | 171566 | 128365 | 74.82 | 125060 | 116080 | 67.66 | 23214 | 13.53 |
| 5-025d | 133197 | 97789  | 73.42 | 95240  | 89218  | 66.98 | 19607 | 14.72 |
| 6-001d | 157687 | 113529 | 72    | 110417 | 102808 | 65.2  | 21184 | 13.43 |
| 6-002d | 135284 | 93020  | 68.76 | 89916  | 85013  | 62.84 | 19633 | 14.51 |
| 6-003d | 127049 | 90912  | 71.56 | 88690  | 84668  | 66.64 | 14982 | 11.79 |
| 6-019d | 154946 | 109829 | 70.88 | 107115 | 101678 | 65.62 | 18437 | 11.9  |
