# Supplementary material for: The Gut Microbiome Alterations in Pediatric Patients with Functional Abdominal Pain Disorders
Source: MDPI journal article supplement (doi:10.3390/microorganisms9112354), 2021-11-15
Supplement: s1 [file s1]

**Questionnaire on Pediatric Gastrointestinal Symptoms,  
Rome IV Version (QPGS-RIV)**

(Adapted from the Questionnaire on Pediatric Gastrointestinal Symptoms,  
Walker, Caplan-Dover, & Rasquin-Weber, 2000)

**Self-Report Form for Children and Adolescents  
(10 years of age and older)**

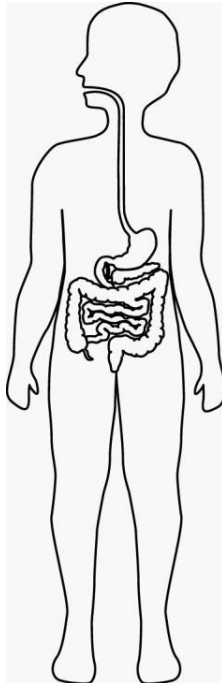

**Instructions**

This questionnaire is about your digestive system (esophagus, stomach, small intestine, and colon) and problems you can have with it. Certain problems may apply to you and others will not.

*Please try to answer all of the questions as best as you can.*

If you have any questions, the research assistant will be glad to help!

## Section A. Pain and Uncomfortable Feelings Above the Belly Button

The dotted line in the picture below shows an area ABOVE your belly button where children sometimes hurt, feel pain, or have an uncomfortable feeling. Some words for these feelings are stomachaches, nausea, bloating, or feeling full after eating very little.

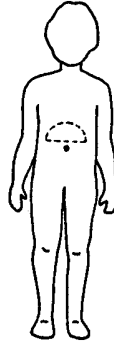

**Above the Belly Button**

The questions in this section are about pain and uncomfortable feelings ABOVE the belly button that you may have had in the past month. Children can have pain and uncomfortable feelings in more than one area of the belly. In different parts of the questionnaire, you will be asked about other areas in your belly.

1. In the past month, on how many days did you have pain, stomach ache or belly ache *above the belly button* (even if it only lasted a small part of the day)?  
0. ☐ Never  
1. ☐ 1 day  
2. ☐ 2 days  
3. ☐ 3 days  
4. ☐ 4 days  
5. ☐ 5 days or more
  
2. In the past month, on how many days did you have burning in your chest (even if it only lasted a small part of the day)?  
0. ☐ Never  
1. ☐ 1 day  
2. ☐ 2 days  
3. ☐ 3 days  
4. ☐ 4 days  
5. ☐ 5 days or more
  
3. In the past month, on how many days did you feel uncomfortably full or have nausea or bloating after a normal sized meal (the amount you usually eat)?  
0. ☐ Never  
1. ☐ 1 day  
2. ☐ 2 days  
3. ☐ 3 days  
4. ☐ 4 days  
5. ☐ 5 days or more

4. In the past month, on how many days were you NOT able to finish your meal because you felt too full?
0. \_\_\_\_ Never  
 1. \_\_\_\_ 1 day  
 2. \_\_\_\_ 2 days  
 3. \_\_\_\_ 3 days  
 4. \_\_\_\_ 4 days  
 5. \_\_\_\_ 5 days or more

***If you have NOT had ANY pain or uncomfortable feelings in the past month (you answered Never to ALL questions 1-4), please go to Section B.***

5. When you feel uncomfortable above your belly button (pain, stomach ache, belly ache, burning, feeling full etc.), do you also have any of the following feelings:  
 (You may check one or more than one.)

- a. Bloating (your belly sticking out more than usual) 0. \_\_\_\_ No 1. \_\_\_\_ Yes  
 b. Nausea (feeling sick to your stomach or like you may throw up) 0. \_\_\_\_ No 1. \_\_\_\_ Yes  
 c. Burping or belching 0. \_\_\_\_ No 1. \_\_\_\_ Yes

6. When you feel uncomfortable above your belly button:

- a. Does it get worse when you eat? 0. \_\_\_\_ No 1. \_\_\_\_ Yes  
 b. Does it get better when you eat? 0. \_\_\_\_ No 1. \_\_\_\_ Yes

7. How long have you felt uncomfortable above your belly button (pain, stomach ache, belly ache, burning, feeling full etc.)?

1. \_\_\_\_ Less than a month  
 2. \_\_\_\_ 2 months  
 3. \_\_\_\_ 3 months  
 4. \_\_\_\_ 4-11 months  
 5. \_\_\_\_ 1 year or longer

*Circle a number for your answer to each question below.*

| <b>In the past month, when you hurt or felt uncomfortable above the belly button, how often:</b> | <u>Never</u> | <u>Once in a while</u> | <u>Sometimes</u> | <u>Most of the time</u> | <u>Always</u> |
|--------------------------------------------------------------------------------------------------|--------------|------------------------|------------------|-------------------------|---------------|
| 8. Did the pain or uncomfortable feeling happen around the time you pooped?                      | 0            | 1                      | 2                | 3                       | 4             |
| 9. Were your poops softer and more mushy or watery than usual?                                   | 0            | 1                      | 2                | 3                       | 4             |
| 10. Were your poops harder or lumpier than usual?                                                | 0            | 1                      | 2                | 3                       | 4             |
| 11. Did you poop more often than usual?                                                          | 0            | 1                      | 2                | 3                       | 4             |
| 12. Did you poop less often than usual?                                                          | 0            | 1                      | 2                | 3                       | 4             |



|                                                                                                                        |              |                        |                  |                         |               |
|------------------------------------------------------------------------------------------------------------------------|--------------|------------------------|------------------|-------------------------|---------------|
| <i>Circle a number for your answer to each question below.</i>                                                         |              |                        |                  |                         |               |
| <b>In the past month, when you had a belly ache, stomach ache or pain around or below the belly button, how often:</b> | <u>Never</u> | <u>Once in a while</u> | <u>Sometimes</u> | <u>Most of the time</u> | <u>Always</u> |
| 4. Did the belly ache, stomach ache or pain happen around the time you pooped?                                         | 0            | 1                      | 2                | 3                       | 4             |
| 5. Were your poops softer and more mushy or watery than usual?                                                         | 0            | 1                      | 2                | 3                       | 4             |
| 6. Were your poops harder or lumpier than usual?                                                                       | 0            | 1                      | 2                | 3                       | 4             |
| 7. Did you poop more often than usual?                                                                                 | 0            | 1                      | 2                | 3                       | 4             |
| 8. Did you have poop less often than usual?                                                                            | 0            | 1                      | 2                | 3                       | 4             |

9. Are you taking medications for constipation or hard stools?

1. ☐ No
2. ☐ Yes
3. ☐ Don't know

9a. If you answered Yes, how often does your belly ache, stomach ache or pain get better if you use these medications?

- a. ☐ Never
- b. ☐ Once in a while
- c. ☐ Sometimes
- d. ☐ Most of the time
- e. ☐ Always

10. Do you ever get **severe intense pain** around the belly button that hurts so much it makes you **stop everything** that you are doing?

0. ☐ No (*if no, please go to section C*)
1. ☐ Yes

10a. When the pain hurts so much that you stop everything you are doing, how long does it usually last?

1. ☐ Less than an hour
2. ☐ 1-2 hours
3. ☐ 3-4 hours
4. ☐ Most of the day
5. ☐ The whole day

10b. IN THE PAST 6 MONTHS how often did it hurt so much around your belly button that you stopped everything you were doing?

1. \_\_\_\_\_ 1 time
2. \_\_\_\_\_ 2 times
3. \_\_\_\_\_ 3-5 times
4. \_\_\_\_\_ 6 or more times

10c. When it hurt so much around your belly button that you stopped everything you were doing, did you have any of the following?

- |                                          |             |              |
|------------------------------------------|-------------|--------------|
| 1. Not wanting to eat                    | 0. _____ No | 1. _____ Yes |
| 2. Nausea (feeling sick to your stomach) | 0. _____ No | 1. _____ Yes |
| 3. Vomiting (throwing up)                | 0. _____ No | 1. _____ Yes |
| 4. Pale skin                             | 0. _____ No | 1. _____ Yes |
| 5. Headache                              | 0. _____ No | 1. _____ Yes |
| 6. Eyes sensitive to light               | 0. _____ No | 1. _____ Yes |

10d. When the pain around your belly button stops, how long does it usually take for another episode of severe intense pain to start?

0. \_\_\_\_\_ several minutes
1. \_\_\_\_\_ several hours
2. \_\_\_\_\_ several days
3. \_\_\_\_\_ several weeks
4. \_\_\_\_\_ several months

## Section C. Bowel Movements (“Poop,” “Stool,” “Number 2”)

This section asks about your bowel movements. There are many words for bowel movements, such as “poop,” “stool,” “BM’s,” and “going to the bathroom for number 2.” Your family may use another special word when they talk about pooping.

1. In the last month, how often did you usually poop?
  1. \_\_\_\_\_ 2 times a week or less often
  2. \_\_\_\_\_ 3-6 times a week
  3. \_\_\_\_\_ Once a day
  4. \_\_\_\_\_ 2-3 times a day
  5. \_\_\_\_\_ More than 3 times a day

### Bristol Stool Chart

|        |                                                                                     |                                                    |
|--------|-------------------------------------------------------------------------------------|----------------------------------------------------|
| Type 1 |    | Separate hard lumps, like nuts<br>(hard to pass)   |
| Type 2 |    | Sausage-shaped but lumpy                           |
| Type 3 |    | Like a sausage but with cracks on<br>its surface   |
| Type 4 |   | Like a sausage or snake, smooth<br>and soft        |
| Type 5 |  | Soft blobs with clear-cut edges<br>(passed easily) |
| Type 6 |  | Fluffy pieces with ragged edges, a<br>mushy stool  |
| Type 7 |  | Watery, no solid pieces.<br><b>Entirely Liquid</b> |

2. Look at the Bristol Stool Chart above. In the last month, what was your poop usually like?
  1. \_\_\_\_\_ Type 1
  2. \_\_\_\_\_ Type 2
  3. \_\_\_\_\_ Type 3
  4. \_\_\_\_\_ Type 4
  5. \_\_\_\_\_ Type 5
  6. \_\_\_\_\_ Type 6
  7. \_\_\_\_\_ Type 7
  8. \_\_\_\_\_ It depends (my poops are not always the same)
  
- 2a. If your poops were usually hard (type 1 or 2 on the pictures above), for how long have they been hard?
  0. \_\_\_\_\_ Less than 1 month
  1. \_\_\_\_\_ 1 month
  2. \_\_\_\_\_ 2 or more months
  3. \_\_\_\_\_ My poops are not usually hard

3. In the last month, did it hurt when you had a poop?
0. \_\_\_\_ No  
1. \_\_\_\_ Yes
4. In the last month, did you have a poop that was so big that it clogged the toilet?
0. \_\_\_\_ No  
1. \_\_\_\_ Yes
5. Some children hold in their poop even when there is a toilet they could use. They may do this by stiffening their bodies or crossing their legs. In the last month, while at home, how often did you try to hold in a poop?
0. \_\_\_\_ Never  
1. \_\_\_\_ 1-3 times a month  
2. \_\_\_\_ Once a week  
3. \_\_\_\_ Several times a week  
4. \_\_\_\_ Every day
6. Did a doctor or nurse ever examine you and say that you had a huge poop inside?
0. \_\_\_\_ No  
1. \_\_\_\_ Yes
7. In the last month, how often did you poop in your pants?
0. \_\_\_\_ Never. (*If never, please go to Section D*)  
1. \_\_\_\_ Less than once a month  
2. \_\_\_\_ 1-3 times a month  
3. \_\_\_\_ Once a week  
4. \_\_\_\_ Several times a week  
5. \_\_\_\_ Every day
- 7a. When you pooped in your pants, how much did it stain or soil your underwear?
1. \_\_\_\_ Underwear was only stained (no poop)  
2. \_\_\_\_ Small amount of poop in underwear (less than a whole poop)  
3. \_\_\_\_ Large amount of poop in underwear (a whole poop)
- 7b. For how long have you pooped in your pants?
1. \_\_\_\_ Less than a month  
2. \_\_\_\_ 1 month  
3. \_\_\_\_ 2 months  
4. \_\_\_\_ 3-11 months  
5. \_\_\_\_ 1 year or longer



## Section D. Nausea and Vomiting

This section asks about feeling nauseated or vomiting. Nausea is when you feel sick to your stomach or feel like you may throw up. There are many words for nausea, such as “upset stomach,” “feeling queasy,” or “feeling sick to your stomach”. Your family may use a special word when talking about nausea.

1. In the past month, how often did you feel nausea or sick to your stomach?

0. \_\_\_\_ Never (*If never, go to question 5*)

1.      1-3 times a month

2.            Once a week

3.        Twice a week

4.        Three times a week or more often

5.          Every day

2. How long have you felt nausea or sick to your stomach?

1.      Less than a month

2. 2 2 months

3.            3 months

4. 4-11 months

5.          1 year or longer

3. Does the nausea usually start after you eat?    0. \_\_\_\_\_ No    1. \_\_\_\_\_ Yes

4. When you have nausea, do you:

1. Vomit

0.\_\_\_\_\_No

1.          Yes

## 2. Feel pain

0.            No

1.            Yes

- 4a. If you have both pain and nausea, which one bothers you the most?

*(Skip this question if you do not have both pain and nausea.)*

1. \_\_\_\_\_ Nausea

## 2. Pain

The next questions are about vomiting. Vomiting is when food comes back from your stomach and out of your mouth. There are many words for vomiting such as “retching,” “throwing up,” “gagging” and “heaving.” Your family may use another special word when they talk about vomiting.

5. In the past month, how often did you vomit or throw up?

0.      Never (If never, go to question 7)

1. 1 1-3 times a month

2.            Once a week

3.          Several times a week

4.            Every day

6. How long have you had problems with vomiting or throwing up?

1.          Less than a month

2. 2 months

3. 3 months

4. 4-11 months

5.        1 year or longer

7. IN THE PAST 6 MONTHS, how many times did you vomit or throw up *again and again without stopping for two hours or longer*?
0. \_\_\_\_\_ Never (*If never, go to question 8*)
1. \_\_\_\_\_ Once
2. \_\_\_\_\_ 2 times
3. \_\_\_\_\_ 3 times
4. \_\_\_\_\_ 4 or more times
- 7a. How long have you had problems with vomiting or throwing up again and again without stopping?
1. \_\_\_\_\_ 1 month or less
2. \_\_\_\_\_ 2-3 months
3. \_\_\_\_\_ 4-5 months
4. \_\_\_\_\_ 6 months or longer
- 7b. Do you usually feel nausea or sick to your stomach when you vomit or throw up again and again without stopping?
0. \_\_\_\_\_ No
1. \_\_\_\_\_ Yes
- 7c. When the vomiting or throwing up stops, how long does it usually take for it to happen again?
0. \_\_\_\_\_ several minutes
1. \_\_\_\_\_ several days
2. \_\_\_\_\_ several weeks
3. \_\_\_\_\_ several months or longer
8. In the past month, how often did food come back up into your mouth after eating?
0. \_\_\_\_\_ Never (*If never, go to question 9*)
1. \_\_\_\_\_ 1-3 times a month
2. \_\_\_\_\_ Once a week
3. \_\_\_\_\_ Several times a week
4. \_\_\_\_\_ Every day
- 8a. If food comes back into your mouth after eating, does this usually happen less than an hour after you eat?
0. \_\_\_\_\_ No
1. \_\_\_\_\_ Yes
- 8b. Does it happen while you are sleeping?
0. \_\_\_\_\_ No
1. \_\_\_\_\_ Yes
- 8c. Do you usually feel nausea, sick to your stomach or vomit and throw up when this happens?
0. \_\_\_\_\_ No
1. \_\_\_\_\_ Yes
- 8d. What do you usually do with the food that comes back up into your mouth?
0. \_\_\_\_\_ Swallow it
1. \_\_\_\_\_ Spit it out

9. Do you ever make yourself vomit or throw up (for example, by sticking a finger in your throat)?

0. \_\_\_\_\_ Never  
 1. \_\_\_\_\_ Once in a while  
 2. \_\_\_\_\_ Sometimes  
 3. \_\_\_\_\_ Most of the time  
 4. \_\_\_\_\_ Always

### Section E. Other Symptoms

| <i>Circle a number for your answer to each question</i>                                         |              |                                |                       |                                   |                     |
|-------------------------------------------------------------------------------------------------|--------------|--------------------------------|-----------------------|-----------------------------------|---------------------|
| <b>In the past month, how often did you:</b>                                                    | <u>Never</u> | 1-3<br>times a<br><u>month</u> | Once a<br><u>week</u> | Several<br>times a<br><u>week</u> | Every<br><u>day</u> |
| 1. Burp (belch) <i>again and again</i> without wanting to?                                      | 0            | 1                              | 2                     | 3                                 | 4                   |
| 2. Pass a lot of gas (fart) <i>very frequently</i> ?                                            | 0            | 1                              | 2                     | 3                                 | 4                   |
| 3. Develop a swollen belly during the day (a belly that definitely sticks out more than usual)? | 0            | 1                              | 2                     | 3                                 | 4                   |
| 4. Swallow or gulp extra air? (You might hear a clicking noise when you swallow)                | 0            | 1                              | 2                     | 3                                 | 4                   |
