# Supplementary material for: The Gut Microbiome Alterations in Pediatric Patients with Functional Abdominal Pain Disorders
Source: MDPI journal article supplement (doi:10.3390/microorganisms9112354), 2021-11-15
Supplement: s1 [file s1]

|                           | Symptomatic |           | Asymptomatic |           | Fisher's Exact Test<br>( <i>p</i> -values) | Significance |
|---------------------------|-------------|-----------|--------------|-----------|--------------------------------------------|--------------|
| Symptoms                  | FAPDs       | Control   | FAPDs        | Control   |                                            |              |
| Difficulty passing stools | 25 (89.3)   | 24 (44.4) | 3 (10.7)     | 30 (55.6) | < 0.001                                    | Yes          |
| Hard stools               | 21 (75.0)   | 33 (61.1) | 7 (25.0)     | 21 (38.9) | 0.231                                      | No           |
| Loose stools              | 18 (64.3)   | 27 (50.0) | 10 (35.7)    | 27 (50.0) | 0.249                                      | No           |
| Abdominal pain            | 27 (96.4)   | 17 (31.5) | 1 (3.6)      | 37 (68.5) | < 0.001                                    | Yes          |
| Vomiting                  | 11 (39.3)   | 8 (14.8)  | 17 (60.7)    | 46 (85.2) | 0.025                                      | Yes          |
| Nausea                    | 23 (82.1)   | 17 (31.5) | 5 (17.9)     | 37 (68.5) | < 0.001                                    | Yes          |
| Feel full                 | 18 (64.3)   | 20 (37.0) | 10 (35.7)    | 34 (63)   | 0.022                                      | Yes          |
| Not finish                | 23 (82.1)   | 17 (31.5) | 5 (17.9)     | 37 (68.5) | < 0.001                                    | Yes          |
