# Supplementary material for: The Gut Microbiome Alterations in Pediatric Patients with Functional Abdominal Pain Disorders
Source: MDPI journal article supplement (doi:10.3390/microorganisms9112354), 2021-11-15
Supplement: s1 [file s1]

| Variable    | Feature                          | Value    | Coefficient  | N   | N.not.0 | P.Value     | Q.Value     |
|-------------|----------------------------------|----------|--------------|-----|---------|-------------|-------------|
| Group       | d__Bacteria;p__Verrucomicrobiota | FAPDs    | -0.026738041 | 213 | 125     | 0.000764991 | 0.005354939 |
| Group       | d__Bacteria;p__Firmicutes        | FAPDs    | -0.035286785 | 213 | 213     | 0.009344018 | 0.03448996  |
| Group       | d__Bacteria;p__Bacteroidota      | FAPDs    | 0.036615934  | 213 | 213     | 0.009854274 | 0.03448996  |
| Group       | d__Bacteria;p__Patescibacteria   | FAPDs    | -0.011339167 | 213 | 98      | 0.013953774 | 0.043411742 |
| School term | d__Bacteria;p__Patescibacteria   | Vacation | 0.019857981  | 213 | 98      | 2.34E-05    | 0.00037461  |
| School term | d__Bacteria;p__Fusobacteriota    | Vacation | 0.023537683  | 213 | 92      | 2.68E-05    | 0.00037461  |
| School term | Unassigned;__                    | Vacation | 0.012526151  | 213 | 64      | 8.01E-05    | 0.000747297 |
| School term | d__Bacteria;p__Spirochaetota     | Vacation | 0.003690758  | 213 | 33      | 0.001844561 | 0.010329544 |
| School term | d__Bacteria;p__Proteobacteria    | Vacation | 0.026617022  | 213 | 212     | 0.006235589 | 0.029099415 |
