# Supplementary material for: The Gut Microbiome Alterations in Pediatric Patients with Functional Abdominal Pain Disorders
Source: MDPI journal article supplement (doi:10.3390/microorganisms9112354), 2021-11-15
Supplement: s1 [file s1]

|    | Variable | Feature                          | Value | Coefficient  | N   | N.not.0 | P.Value   | Q.Value   |
|----|----------|----------------------------------|-------|--------------|-----|---------|-----------|-----------|
| 1  | Group    | Lachnospiraceae_ND3007_group     | FAPDs | -0.029495425 | 213 | 149     | 1.24E-07  | 2.86E-05  |
| 2  | Group    | Ruminococcus                     | FAPDs | -0.037927312 | 213 | 163     | 1.55E-06  | 0.0001734 |
| 3  | Group    | UCG-003                          | FAPDs | -0.028022565 | 213 | 122     | 1.88E-06  | 0.0001734 |
| 4  | Group    | Lachnospiraceae_NK4A136_group    | FAPDs | -0.036178951 | 213 | 172     | 1.29E-05  | 0.0005435 |
| 5  | Group    | FCS020_group                     | FAPDs | -0.018135944 | 213 | 120     | 3.86E-05  | 0.0011149 |
| 6  | Group    | CAG-56                           | FAPDs | -0.018979783 | 213 | 71      | 5.35E-05  | 0.0014033 |
| 7  | Group    | Candidatus_Stoquefichus          | FAPDs | 0.014118554  | 213 | 36      | 5.47E-05  | 0.0014033 |
| 8  | Group    | Christensenellaceae_R-7_group    | FAPDs | -0.026879815 | 213 | 177     | 6.15E-05  | 0.0014199 |
| 9  | Group    | Eubacterium                      | FAPDs | 0.005688827  | 213 | 13      | 6.15E-05  | 0.0014199 |
| 10 | Group    | Bacteroides                      | FAPDs | 0.119127237  | 213 | 212     | 7.05E-05  | 0.0015519 |
| 11 | Group    | Erysipelotrichaceae_UCG-003      | FAPDs | -0.023549087 | 213 | 137     | 0.0001234 | 0.0024791 |
| 12 | Group    | ;g__uncultured                   | FAPDs | -0.011540048 | 213 | 27      | 0.0003418 | 0.0047858 |
| 13 | Group    | g__Mitochondria                  | FAPDs | -0.001803269 | 213 | 6       | 0.0004311 | 0.0055327 |
| 14 | Group    | Sutterella                       | FAPDs | -0.026977059 | 213 | 79      | 0.0005201 | 0.0064943 |
| 15 | Group    | Coprococcus                      | FAPDs | -0.021395517 | 213 | 174     | 0.0009793 | 0.0110351 |
| 16 | Group    | Neisseria                        | FAPDs | -0.027535808 | 213 | 85      | 0.0015308 | 0.0167061 |
| 17 | Group    | Lachnospiraceae_UCG-010          | FAPDs | -0.008055101 | 213 | 33      | 0.0017488 | 0.0181399 |
| 18 | Group    | Enterobacteriaceae;__            | FAPDs | -0.027444005 | 213 | 152     | 0.0017669 | 0.0181399 |
| 19 | Group    | Akkermansia                      | FAPDs | -0.02567955  | 213 | 116     | 0.0018474 | 0.01816   |
| 20 | Group    | _UCG-009                         | FAPDs | -0.004941857 | 213 | 20      | 0.0020066 | 0.0186209 |
| 21 | Group    | Lachnospiraceae_UCG-001          | FAPDs | -0.012861216 | 213 | 72      | 0.0020552 | 0.0186209 |
| 22 | Group    | Porphyromonas                    | FAPDs | -0.018937999 | 213 | 90      | 0.0020556 | 0.0186209 |
| 23 | Group    | Subdoligranulum                  | FAPDs | -0.023889331 | 213 | 194     | 0.0022979 | 0.0204162 |
| 24 | Group    | Dialister                        | FAPDs | -0.024308842 | 213 | 159     | 0.0023827 | 0.0207697 |
| 25 | Group    | UCG-002                          | FAPDs | -0.031163798 | 213 | 158     | 0.0024392 | 0.020869  |
| 26 | Group    | [Eubacterium]_xylanophilum_group | FAPDs | -0.014993882 | 213 | 104     | 0.0025435 | 0.0213652 |
| 27 | Group    | [Clostridium]_innocuum_group     | FAPDs | 0.012062481  | 213 | 102     | 0.0029145 | 0.0236228 |
| 28 | Group    | [Eubacterium]_ventriosum_group   | FAPDs | -0.013281023 | 213 | 156     | 0.0032517 | 0.0259018 |
| 29 | Group    | Fusicatenibacter                 | FAPDs | -0.025193424 | 213 | 189     | 3.43E-03  | 2.69E-02  |
| 30 | Group    | Monoglobus                       | FAPDs | -0.01387037  | 213 | 167     | 3.87E-03  | 0.0298119 |
| 31 | Group    | Anaerofustis                     | FAPDs | 0.002238282  | 213 | 6       | 4.57E-03  | 0.0346158 |
| 32 | Group    | Eisenbergiella                   | FAPDs | 0.01111388   | 213 | 55      | 4.72E-03  | 0.0351824 |
| 33 | Group    | Faecalibacterium                 | FAPDs | -0.032405227 | 213 | 208     | 5.98E-03  | 0.0418385 |

|    |             |                                                                                                     |          |              |     |     |           |           |
|----|-------------|-----------------------------------------------------------------------------------------------------|----------|--------------|-----|-----|-----------|-----------|
| 34 | Group       | Acetanaerobacterium                                                                                 | FAPDs    | 0.002316701  | 213 | 19  | 6.37E-03  | 0.0428182 |
| 35 | Group       | Eggerthella                                                                                         | FAPDs    | 0.009001483  | 213 | 106 | 6.39E-03  | 0.0428182 |
| 36 | Group       | Solobacterium                                                                                       | FAPDs    | -0.011008284 | 213 | 78  | 6.61E-03  | 0.0436107 |
| 37 | Group       | Romboutsia                                                                                          | FAPDs    | -0.017168158 | 213 | 156 | 6.98E-03  | 0.0454005 |
| 38 | Group       | Veillonella                                                                                         | FAPDs    | -0.033712912 | 213 | 124 | 7.35E-03  | 0.0471869 |
| 39 | School term | Enterobacteriaceae;__                                                                               | Vacation | 0.048942263  | 213 | 152 | 5.78E-08  | 2.67E-05  |
| 40 | School term | Neisseria                                                                                           | Vacation | 0.042965906  | 213 | 85  | 1.25E-06  | 0.0001734 |
| 41 | School term | Solobacterium                                                                                       | Vacation | 0.019184034  | 213 | 78  | 3.54E-06  | 0.0002728 |
| 42 | School term | Porphyromonas                                                                                       | Vacation | 0.028087586  | 213 | 90  | 6.92E-06  | 0.000433  |
| 43 | School term | Bacteroides                                                                                         | Vacation | -0.135430833 | 213 | 212 | 7.50E-06  | 0.000433  |
| 44 | School term | Megasphaera                                                                                         | Vacation | 0.027242411  | 213 | 95  | 1.11E-05  | 0.0005312 |
| 45 | School term | Moraxella                                                                                           | Vacation | 0.019881483  | 213 | 78  | 1.15E-05  | 0.0005312 |
| 46 | School term | Alloprevotella                                                                                      | Vacation | 0.023603048  | 213 | 83  | 1.70E-05  | 0.0006532 |
| 47 | School term | Granulicatella                                                                                      | Vacation | 0.026142153  | 213 | 86  | 2.88E-05  | 0.0010006 |
| 48 | School term | Atopobium                                                                                           | Vacation | 0.028952297  | 213 | 80  | 3.03E-05  | 0.0010006 |
| 49 | School term | Parvimonas                                                                                          | Vacation | 0.018011122  | 213 | 82  | 3.71E-05  | 0.0011149 |
| 50 | School term | Veillonella                                                                                         | Vacation | 0.050102609  | 213 | 124 | 8.50E-05  | 0.0017842 |
| 51 | School term | Lactobacillus                                                                                       | Vacation | 0.051356237  | 213 | 103 | 0.0001348 | 0.0025956 |
| 52 | School term | Alloscardovia                                                                                       | Vacation | 0.027406326  | 213 | 79  | 0.0001598 | 0.0029536 |
| 53 | School term | Fusobacterium                                                                                       | Vacation | 0.019537282  | 213 | 90  | 0.0001955 | 0.0033747 |
| 54 | School term | Gemella                                                                                             | Vacation | 0.020119509  | 213 | 84  | 0.0002037 | 0.0033747 |
| 55 | School term | Stenotrophomonas                                                                                    | Vacation | 0.020731485  | 213 | 80  | 0.0002045 | 0.0033747 |
| 56 | School term | Saccharimonadaceae;g__TM7x                                                                          | Vacation | 0.014326151  | 213 | 94  | 0.0002207 | 0.0035165 |
| 57 | School term | Peptoniphilus                                                                                       | Vacation | 0.020246875  | 213 | 81  | 0.0002982 | 0.0045919 |
| 58 | School term | g__Mitochondria                                                                                     | Vacation | 0.001844637  | 213 | 6   | 0.0003356 | 0.0047858 |
| 59 | School term | Actinomyces                                                                                         | Vacation | 0.017262775  | 213 | 79  | 0.0003396 | 0.0047858 |
| 60 | School term | Peptostreptococcus                                                                                  | Vacation | 0.021625287  | 213 | 80  | 0.0003566 | 0.004846  |
| 61 | School term | d__Bacteria;p__Firmicutes;c__Clostridia;o__Lachnospirales;f__Lachnospiraceae;g__Lachnoanaerobaculum | Vacation | 0.003459835  | 213 | 12  | 0.0004254 | 0.0055327 |
| 62 | School term | Klebsiella                                                                                          | Vacation | 0.027506904  | 213 | 87  | 0.0005619 | 0.0068319 |
| 63 | School term | Streptococcus                                                                                       | Vacation | 0.035281599  | 213 | 199 | 0.0005996 | 0.0071029 |
| 64 | School term | Bacilli;__;__;__                                                                                    | Vacation | 0.013448316  | 213 | 69  | 0.0006708 | 0.0077478 |
| 65 | School term | Prevotella                                                                                          | Vacation | 0.099011566  | 213 | 130 | 0.0015549 | 0.0167061 |
| 66 | School term | Treponema                                                                                           | Vacation | 0.003690758  | 213 | 33  | 0.0018446 | 0.01816   |

|    |             |                             |          |              |     |     |           |           |
|----|-------------|-----------------------------|----------|--------------|-----|-----|-----------|-----------|
| 67 | School term | [Eubacterium]_nodatum_group | Vacation | 0.009232286  | 213 | 74  | 0.0020101 | 0.0186209 |
| 68 | School term | Absconditabacteriales_(SR1) | Vacation | 0.003050804  | 213 | 29  | 0.002788  | 0.0230007 |
| 69 | School term | Holdemania                  | Vacation | -0.008067554 | 213 | 126 | 0.0050945 | 0.03736   |
| 70 | School term | Weissella                   | Vacation | 0.002571863  | 213 | 4   | 0.0052146 | 0.037643  |
| 71 | School term | Haemophilus                 | Vacation | 0.019701054  | 213 | 123 | 0.0057193 | 0.0406507 |
| 72 | School term | Selenomonas                 | Vacation | 0.003123609  | 213 | 22  | 0.006348  | 0.0428182 |
