# Supplementary material for: The Gut Microbiome Alterations in Pediatric Patients with Functional Abdominal Pain Disorders
Source: MDPI journal article supplement (doi:10.3390/microorganisms9112354), 2021-11-15
Supplement: s1 [file s1]

| Sample ID | T-score |
|-----------|---------|
| 1-001     | 70.8    |
| 1-002     | 57.1    |
| 1-003     | 60.1    |
| 1-004     | 51.6    |
| 1-005     | 59.1    |
| 1-006     | 37      |
| 1-007     | 42.6    |
| 1-008     | 64.9    |
| 1-009     | 54      |
| 1-011     | 63      |
| 1-012     | 63.9    |
| 1-015     | 37      |
| 1-016     | NA      |
| 1-017     | 50.3    |
| 1-021     | 62      |
| 1-024     | 42.6    |
| 1-025     | 66.8    |
| 1-027     | 59.1    |
| 1-029     | 37      |
| 1-030     | 52.8    |
| 1-033     | 47.2    |
| 1-034     | 60.1    |
| 1-036     | 51.6    |
| 1-039     | 56.1    |
| 1-043     | 50.3    |
| 1-044     | 63.9    |
| 1-046     | 71.9    |
| 1-055     | 64.9    |
| 1-001c    | 77.2    |
| 1-002c    | 65.9    |
| 1-003c    | 69.8    |
| 1-005c    | 65.9    |
| 1-006c    | NA      |
| 1-007c    | 57.1    |
| 1-011c    | 64.9    |
| 1-015c    | 45.2    |
| 1-016c    | 51.9    |
| 1-017c    | 43.5    |
| 1-021c    | 60.1    |
| 1-024c    | 55      |

|        |      |
|--------|------|
| 1-025c | 61   |
| 1-029c | 37   |
| 1-030c | 56.1 |
| 1-033c | 56.1 |
| 1-039c | 59.1 |
| 1-043c | 50.3 |
| 1-044c | 67.8 |
| 1-001d | 75.6 |
| 1-002d | 62   |
| 1-003d | NA   |
| 1-005d | 65.9 |
| 1-006d | NA   |
| 1-007d | 56.1 |
| 1-008d | 63.9 |
| 1-011d | 57.1 |
| 1-015d | 37   |
| 1-016d | 57.2 |
| 1-017d | 37.6 |
| 1-021d | 58.1 |
| 1-024d | 63   |
| 1-025d | 71.9 |
| 1-029d | 37   |
| 1-030d | 51.6 |
| 1-033d | 47.2 |
| 1-036c | 55   |
| 1-039d | 60.1 |
| 1-043d | 50.3 |
| 1-044d | 66.8 |
| 1-046d | NA   |
| 1-055c | 63.9 |
