# Supplementary material for: The Gut Microbiome Alterations in Pediatric Patients with Functional Abdominal Pain Disorders
Source: MDPI journal article supplement (doi:10.3390/microorganisms9112354), 2021-11-15
Supplement: s1 [file s1]

Subject ID: \_\_\_\_\_ Date: \_\_\_\_/\_\_\_\_/\_\_\_\_

Please rate each gut problem on a scale from 0 to 10 where **0 = Does not bother me at all** and **10 = the most bothersome problem you can imagine**. Circle your response.

1) Difficulty passing stool

(Does not bother me) 0 1 2 3 4 5 6 7 8 9 10 (Most bothersome you can imagine)

2) Hard stools

(Does not bother me) 0 1 2 3 4 5 6 7 8 9 10 (Most bothersome you can imagine)

3) Loose stools

(Does not bother me) 0 1 2 3 4 5 6 7 8 9 10 (Most bothersome you can imagine)

4) Abdominal pain

(Does not bother me) 0 1 2 3 4 5 6 7 8 9 10 (Most bothersome you can imagine)

5) Vomiting

(Does not bother me) 0 1 2 3 4 5 6 7 8 9 10 (Most bothersome you can imagine)

6) Nausea

(Does not bother me) 0 1 2 3 4 5 6 7 8 9 10 (Most bothersome you can imagine)

7) Feeling full minutes after you start eating

(Does not bother me) 0 1 2 3 4 5 6 7 8 9 10 (Most bothersome you can imagine)

8) Not being able to finish your meal

(Does not bother me) 0 1 2 3 4 5 6 7 8 9 10 (Most bothersome you can imagine)

**The answers above are for study-related purposes only and do not substitute for communication with your primary care physician (PCP). If your child scores greater than a score of 5 for any of the above questions, please discuss with your PCP. No outreach will be provided by the PCP or GI team in response to a positive symptom screen.**
