# Supplementary figures and images for: The Gut Microbiome Alterations in Pediatric Patients with Functional Abdominal Pain Disorders
Source: MDPI journal article supplement (doi:10.3390/microorganisms9112354), 2021-11-15

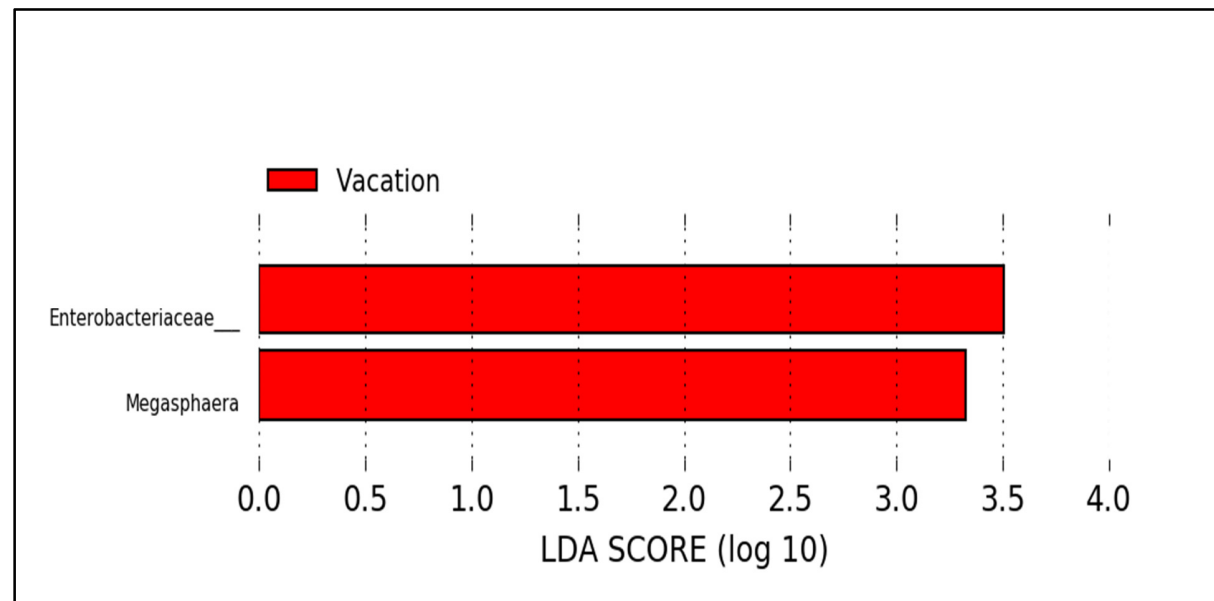

Supplement: s1 [file s1]

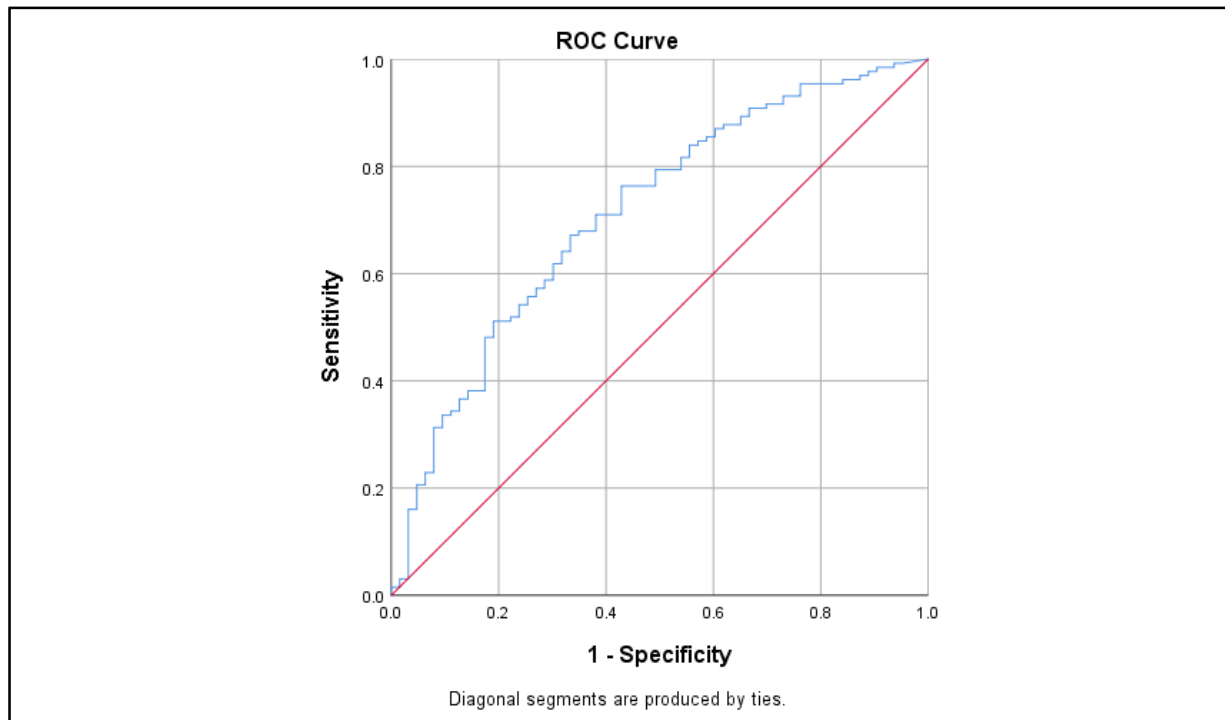

**(A)**

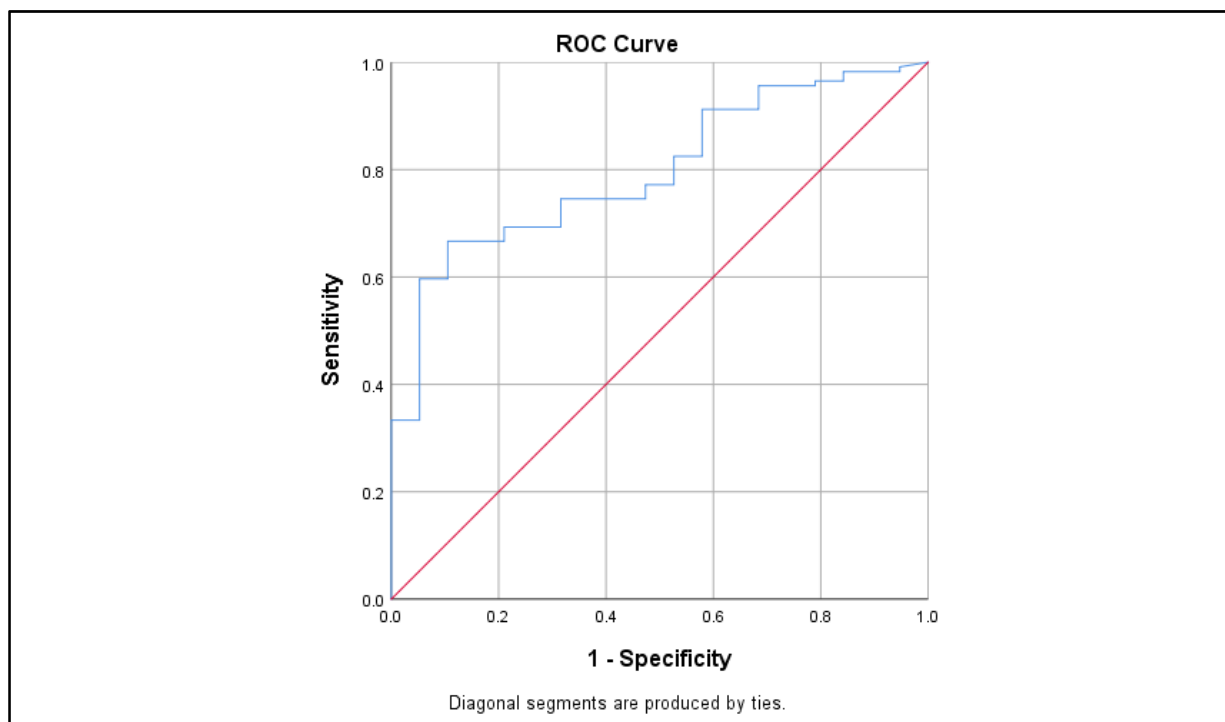

**(B)**

Supplement: s1 [file s1]
